# Supplementary material for: Rapid reconstruction of neural circuits using tissue expansion and light sheet microscopy
Source: eLife. 2022 Oct 26;11:e81248. doi: 10.7554/eLife.81248 (PMC9651950; doi:10.7554/eLife.81248)
Supplement: Supplementary file 1. [file elife-81248-supp1.xlsx]

## Sheet: Sheet1
Fig.	Genotype	Neurons>Reporters	Age	Sex	Primary Antibodies and Concentrations	Secondary Antibodies and Concentrations	Transgenic Fly Source
2A	10XUAS-IVS-myr::smGdP-HA (attP18), 13XLexAop2-IVS-myr::smGdP-FLAG (in su(Hw)attP8); VT000454-LexAGAD (attp40)/VT002064-p65ADZp; dsx-ZpGAL4DBD	SAG>smGdP-FLAG, pC1>smGdP-HA	4 days old	F	Rabbit anti HA (1:200, Cell Signaling Technology, HA-Tag (C29F4) Rabbit mAb #3724); Rat anti FLAG (1:200, Novus Biologicals, DYKDDDDK Epitope Tag Antibody (L5) NBP1-06712); Mouse anti BRP (1:33, Developmental Studies Hybridoma Bank, nc82)	1:500, Invitrogen, Goat anti-Rabbit IgG (H+L) Cross-Adsorbed Secondary Antibody, Alexa Fluor 568, A11011; 1:500, Invitrogen, Goat anti-Rat IgG (H+L) Cross-Adsorbed Secondary Antibody, Alexa Fluor 488, A11066; 1:500, Novus Biologicals, Goat anti-Mouse IgG (H+L) Secondary Antibody, Janelia Fluor 646, NBP1-72702JF646*	10XUAS-IVS-myr::smGdP-HA, 13XLexAop2-IVS-myr::smGdP-FLAG (1); SAG (2); pC1 (3)
2B-G	10XUAS-IVS-myr::smGdP-HA (attP18), 13XLexAop2-IVS-myr::smGdP-FLAG (in su(Hw)attP8); VT044309-LexAGAD (attp40)/24C08-p65ADZp (attp40); UAS-Drep2-strawberry/VT043669-ZpGAL4DBD (attp2)	DA1-IPN>smGdP-FLAG, LHAV4>smGdP-HA (not shown); LHAV4>Drep2-strawberry (not shown)	4-6 days old	M	Rabbit anti HA (1:200, Cell Signaling Technology, HA-Tag (C29F4) Rabbit mAb #3724); Rat anti FLAG (1:200, Novus Biologicals, DYKDDDDK Epitope Tag Antibody (L5) NBP1-06712); Mouse anti BRP (1:33, Developmental Studies Hybridoma Bank, nc82)	1:500, Invitrogen, Goat anti-Rabbit IgG (H+L) Cross-Adsorbed Secondary Antibody, Alexa Fluor 568, A11011; 1:500, Invitrogen, Goat anti-Rat IgG (H+L) Cross-Adsorbed Secondary Antibody, Alexa Fluor 488, A11066; 1:500, Novus Biologicals, Goat anti-Mouse IgG (H+L) Secondary Antibody, Janelia Fluor 646, NBP1-72702JF646*	10XUAS-IVS-myr::smGdP-HA, 13XLexAop2-IVS-myr::smGdP-FLAG (1); UAS-drep2-strawberry (4); DA1-IPN (5); LHAV4 (5)
2H-P	20XUAS-IVS-mCD8-GFP (attp5)/53G02-p65ADZp (attp40); 29G11-ZpGAL4DBD (attp2)	L2>membrane (not shown)	6 days old	F	Chicken anti GFP (1:1000, Abcam, Anti-GFP antibody (ab13970)); Mouse anti BRP (1:33, Developmental Studies Hybridoma Bank, nc82)	1:500, Invitrogen, Goat anti-Chicken IgY (H+L) Secondary Antibody, Alexa Fluor 488, A11039; 1:500 Goat anti-Mouse IgG (H+L) Highly Cross-Adsorbed Secondary Antibody, Alexa Fluor 568, A11031	20XUAS-IVS-mCD8-GFP (6); L2 (7)
3B, D-G	20XUAS-IVS-mCD8-GFP (attp5)/53G02-p65ADZp (attp40); 29G11-ZpGAL4DBD (attp2)	L2>membrane	6 days old	F	Rabbit anti dsRed (1:1000, Takara Bio Living Colors® DsRed Polyclonal Antibody,632496); Mouse anti BRP (1:33, Developmental Studies Hybridoma Bank, nc82)	1:500, Invitrogen, Goat anti-Rabbit IgG (H+L) Cross-Adsorbed Secondary Antibody, Alexa Fluor 568, A11011; 1:500, Invitrogen, Goat anti-Mouse IgG (H+L) Highly Cross-Adsorbed Secondary Antibody, Alexa Fluor 488, A11029	20XUAS-IVS-mCD8-GFP (6); L2 (7)
3H-J	LexAop-myr-tdTomato/53G02-p65ADZp (attp40); UAS-FLP, brp-FRT-stop-FRT-V5-2A-LexA-VP16/29G11-ZpGAL4DBD (attp2)	L2>membrane, L2>STaR-BRP	6 days old	F	Rabbit anti dsRed (1:1000, Takara Bio Living Colors® DsRed Polyclonal Antibody,632496); Mouse anti V5 (1:200, Mouse anti V5-Tag Antibody, clone SV5-Pk1, MCA1360)	1:500, Invitrogen, Goat anti-Rabbit IgG (H+L) Cross-Adsorbed Secondary Antibody, Alexa Fluor 568, A11011; 1:500, Invitrogen, Goat anti-Mouse IgG (H+L) Highly Cross-Adsorbed Secondary Antibody, Alexa Fluor 488, A11029	LexAop-myr-tdTomato; UAS-FLP, brp-FRT-stop-FRT-V5-2A-LexA-VP16 (8); L2 (7)
3L, N-P	10XUAS-IVS-myr::smGdP-HA (attP18), 13XLexAop2-IVS-myr::smGdP-FLAG (in su(Hw)attP8); VT044309-LexAGAD (attp40)/24C08-p65ADZp (attp40); UAS-Drep2-strawberry/VT043669-ZpGAL4DBD (attp2)	DA1-IPN>smGdP-FLAG, LHAV4>smGdP-HA (not shown); LHAV4>Drep2-strawberry (not shown)	5 days old	F	Rabbit anti HA (1:200, Cell Signaling Technology, HA-Tag (C29F4) Rabbit mAb #3724); Rat anti FLAG (1:200, Novus Biologicals, DYKDDDDK Epitope Tag Antibody (L5) NBP1-06712); Mouse anti BRP (1:33, Developmental Studies Hybridoma Bank, nc82)	1:500, Invitrogen, Goat anti-Rabbit IgG (H+L) Cross-Adsorbed Secondary Antibody, Alexa Fluor 568, A11011; 1:500, Invitrogen, Goat anti-Rat IgG (H+L) Cross-Adsorbed Secondary Antibody, Alexa Fluor 488, A11066; 1:500, Active Motif, Goat anti-Mouse IgG Secondary Antibody, ATTO 655 (STED), 15059#	10XUAS-IVS-myr::smGdP-HA, 13XLexAop2-IVS-myr::smGdP-FLAG (1); UAS-drep2-strawberry (4); DA1-IPN (5); LHAV4 (5)
3R	13XLexAop2-IVS-myr::smGFP-OLLAS [attP18]; VT00454LexAGAD (attp40)/VT002064-p65ADZp; 10XUAS-smFP-HA-drep2-sv40 (VK00005)/dsx-ZpGAL4DBD	SAG>smGdP-OLLAS, pC1>Drep2-HA (not shown)	4 days old	F	Rat anti OLLAS (1:200, Novus Biologicals, OLLAS Epitope Tag Antibody (L2), NBP1-06713); Rabbit anti HA (1:200, Cell Signaling Technology, HA-Tag (C29F4) Rabbit mAb #3724); Mouse anti BRP (1:33, Developmental Studies Hybridoma Bank, nc82)	1:500, Invitrogen, Goat anti-Rabbit IgG (H+L) Cross-Adsorbed Secondary Antibody, Alexa Fluor 568, A11011; 1:500, Invitrogen, Goat anti-Rat IgG (H+L) Cross-Adsorbed Secondary Antibody, Alexa Fluor 488, A11066; 1:500, Novus Biologicals, Goat anti-Mouse IgG (H+L) Secondary Antibody, Janelia Fluor 646, NBP1-72702JF646*	13XLexAop2-IVS-myr::smGdP-OLLAS (1); 10XUAS-smFP-HA-drep2-sv40 (9); SAG (2); pC1 (3)
4B-F	13XLexAop2-IVS-myr::smGFP-OLLAS [attP18]; VT00454LexAGAD (attp40)/VT002064-p65ADZp; 10XUAS-smFP-HA-drep2-sv40 (VK00005)/dsx-ZpGAL4DBD	SAG>smGdP-OLLAS, pC1>Drep2-HA	5 days old	F	Rat anti OLLAS (1:200, Novus Biologicals, OLLAS Epitope Tag Antibody (L2), NBP1-06713); Rabbit anti HA (1:200, Cell Signaling Technology, HA-Tag (C29F4) Rabbit mAb #3724); Mouse anti BRP (1:33, Developmental Studies Hybridoma Bank, nc82)	1:500, Invitrogen, Goat anti-Rabbit IgG (H+L) Cross-Adsorbed Secondary Antibody, Alexa Fluor 568, A11011; 1:500, Invitrogen, Goat anti-Rat IgG (H+L) Cross-Adsorbed Secondary Antibody, Alexa Fluor 488, A11066; 1:500, Novus Biologicals, Goat anti-Mouse IgG (H+L) Secondary Antibody, Janelia Fluor 646, NBP1-72702JF646*	13XLexAop2-IVS-myr::smGdP-OLLAS (1); 10XUAS-smFP-HA-drep2-sv40 (9); SAG (2); pC1 (3)
4I-O	10XUAS-IVS-myr::smGdP-HA (attP18), 13XLexAop2-IVS-myr::smGdP-FLAG (in su(Hw)attP8); VT000454-LexAGAD (attp40)/VT002064-p65ADZp; dsx-ZpGAL4DBD	SAG>smGdP-FLAG, pC1>smGdP-HA	4 days old	F	Rabbit anti HA (1:200, Cell Signaling Technology, HA-Tag (C29F4) Rabbit mAb #3724); Rat anti FLAG (1:200, Novus Biologicals, DYKDDDDK Epitope Tag Antibody (L5) NBP1-06712); Mouse anti BRP (1:33, Developmental Studies Hybridoma Bank, nc82)	1:500, Invitrogen, Goat anti-Rabbit IgG (H+L) Cross-Adsorbed Secondary Antibody, Alexa Fluor 568, A11011; 1:500, Invitrogen, Goat anti-Rat IgG (H+L) Cross-Adsorbed Secondary Antibody, Alexa Fluor 488, A11066; 1:500, Novus Biologicals, Goat anti-Mouse IgG (H+L) Secondary Antibody, Janelia Fluor 646, NBP1-72702JF646*	10XUAS-IVS-myr::smGdP-HA, 13XLexAop2-IVS-myr::smGdP-FLAG (1); SAG (2); pC1 (3)
5A-D	10XUAS-IVS-myr::smGdP-HA (attP18), 13XLexAop2-IVS-myr::smGdP-FLAG (in su(Hw)attP8); 43924-LexAp65 (JK22C); 39575-GAL4 (attp2)	MB-DPM>smGdP-HA, MB-APL>smGdP-FLAG (not shown)	4 days old	M	Rat anti HA (1:200, Roche, Anti-HA High Affinity from rat IgG1 11867423001); Mouse anti V5 (1:200, Mouse anti V5-Tag Antibody, clone SV5-Pk1, MCA1360); Rabbit anti INX6 (1:2500, Chia-Lin Wu)	1:500, Invitrogen, Goat anti-Rabbit IgG (H+L) Highly Cross-Adsorbed Secondary Antibody, Alexa Fluor 488 A11029; 1:500, Invitrogen, Goat anti-Rat IgG (H+L) Cross-Adsorbed Secondary Antibody, Alexa Fluor 568 A11011; 1:500, Novus Biologicals, Goat anti-Mouse IgG (H+L) Secondary Antibody, Janelia Fluor 646, NBP1-72702JF646*	10XUAS-IVS-myr::smGdP-HA, 13XLexAop2-IVS-myr::smGdP-FLAG (1); MB-DPM (10); MB-APL (11)
5E-H	10XUAS-IVS-myr::smGdP-HA (attP18), 13XLexAop2-IVS-myr::smGdP-FLAG (in su(Hw)attP8); 43924-LexAp65 (JK22C); 39575-GAL4 (attp2)	MB-DPM>smGdP-HA, MB-APL>smGdP-FLAG	5 days old	F	Rat anti HA (1:200, Roche, Anti-HA High Affinity from rat IgG1 11867423001); Mouse anti V5 (1:200, Mouse anti V5-Tag Antibody, clone SV5-Pk1, MCA1360); Rabbit anti INX6 (1:2500, Chia-Lin Wu)	1:500, Invitrogen, Goat anti-Rabbit IgG (H+L) Highly Cross-Adsorbed Secondary Antibody, Alexa Fluor 488 A11029; 1:500, Invitrogen, Goat anti-Rat IgG (H+L) Cross-Adsorbed Secondary Antibody, Alexa Fluor 568 A11011; 1:500, Novus Biologicals, Goat anti-Mouse IgG (H+L) Secondary Antibody, Janelia Fluor 646, NBP1-72702JF646*	10XUAS-IVS-myr::smGdP-HA, 13XLexAop2-IVS-myr::smGdP-FLAG (1); MB-DPM (10); MB-APL (11)
6E-F	13XLexAop2-CsChrimson-tdTomato [attP18], 20XUAS-IVS-Syn21-opGCaMP6f-p10 [in su(Hw)attP8]; VT016273-p65ADZp (attP40), VT050279-ZpLexADBD (JK22C)/VT40556-p65ADZp; VT050279-ZpLexADBD (attP2)/VT40347-ZpGAL4DBD	pC2l>CsChrimson-tdTomato, pIP10>GCaMP6f	5 days old	M	Rabbit anti dsRed (1:1000, Takara Bio Living Colors® DsRed Polyclonal Antibody,632496); Chicken anti GFP (1:1000, Abcam, Anti-GFP antibody (ab13970)); Mouse anti BRP (1:33, Developmental Studies Hybridoma Bank, nc82)	1:500, Invitrogen, Goat anti-Rabbit IgG (H+L) Cross-Adsorbed Secondary Antibody, Alexa Fluor 568, A11011; 1:500, Invitrogen, Goat anti-Chicken IgY (H+L) Secondary Antibody, Alexa Fluor 488, A11039; 1:500, Novus Biologicals, Goat anti-Mouse IgG (H+L) Secondary Antibody, Janelia Fluor 646, NBP1-72702JF646*	13XLexAop2-CsChrimson-tdTomato, 20XUAS-IVS-Syn21-opGCaMP6f-p10 (12); pIP10 (13); pC2l (5)
Fig.2 Sup. 1	10XUAS-IVS-myr::smGdP-HA (attP18), 13XLexAop2-IVS-myr::smGdP-FLAG (in su(Hw)attP8); VT000454-LexAGAD (attp40)/VT002064-p65ADZp; dsx-ZpGAL4DBD	SAG>smGdP-FLAG, pC1>smGdP-HA	5 days old	F	Rabbit anti HA (1:200, Cell Signaling Technology, HA-Tag (C29F4) Rabbit mAb #3724); Rat anti FLAG (1:200, Novus Biologicals, DYKDDDDK Epitope Tag Antibody (L5) NBP1-06712); Mouse anti BRP (1:33, Developmental Studies Hybridoma Bank, nc82)	1:500, Invitrogen, Goat anti-Rabbit IgG (H+L) Cross-Adsorbed Secondary Antibody, Alexa Fluor 568, A11011; 1:500, Invitrogen, Goat anti-Rat IgG (H+L) Cross-Adsorbed Secondary Antibody, Alexa Fluor 488, A11066; 1:500, Novus Biologicals, Goat anti-Mouse IgG (H+L) Secondary Antibody, Janelia Fluor 646, NBP1-72702JF646*	10XUAS-IVS-myr::smGdP-HA, 13XLexAop2-IVS-myr::smGdP-FLAG (1); SAG (2); pC1 (3)
Fig. 2 Sup. 2	10XUAS-IVS-myr::smGdP-HA (attP18), 13XLexAop2-IVS-myr::smGdP-FLAG (in su(Hw)attP8); VT044309-LexAGAD (attp40)/24C08-p65ADZp [attp40]; UAS-drep2-strawberry/VT043669-ZpGAL4DBD [attp2]	DA1-IPN>smGdP-FLAG (not shown), LHAV4>smGdP-HA, LHAV4>drep2-strawberry (not shown)	4-6 days old	F	Rabbit anti HA (1:200, Cell Signaling Technology, HA-Tag (C29F4) Rabbit mAb #3724); Rat anti FLAG (1:200, Novus Biologicals, DYKDDDDK Epitope Tag Antibody (L5) NBP1-06712); Mouse anti BRP (1:33, Developmental Studies Hybridoma Bank, nc82)	1:500, Invitrogen, Goat anti-Rabbit IgG (H+L) Cross-Adsorbed Secondary Antibody, Alexa Fluor 568, A11011; 1:500, Invitrogen, Goat anti-Rat IgG (H+L) Cross-Adsorbed Secondary Antibody, Alexa Fluor 488, A11066; 1:500, Novus Biologicals, Goat anti-Mouse IgG (H+L) Secondary Antibody, Janelia Fluor 646, NBP1-72702JF646*	10XUAS-IVS-myr::smGdP-HA, 13XLexAop2-IVS-myr::smGdP-FLAG (1); DA1-IPN (5); LHAV4 (5)
Table 1: Genotype, neurons, reporters, age, sex, antibodies, antibody concentrations, and transgenic fly source for data and figure panels.
*: Novus Biologicals, Goat anti-Mouse IgG (H+L) Secondary Antibody, Janelia Fluor 646, NBP1-72702JF646 is not highly cross-adsorbed. No cross-reactivity here, but later lots showed cross-reactivity issues. Using a highly-cross adsorbed secondary antibody is recommended.
#: Active Motif, Goat anti-Mouse IgG Secondary Antibody, ATTO 655 (STED), 15059 is discontinued.
INX6 Antibody Source
	Wu CL, Shih MFM, Lai JSY, Yang HT, Turner GC, Chen L, Chiang AS (2011) Heterotypic Gap Junctions between Two Neurons in the Drosophila Brain Are Critical for Memory. Curr Biol 21:848–854.
Transgenic Fly Source
1	Nern A, Pfeiffer BD, Rubin GM (2015) Optimized tools for multicolor stochastic labeling reveal diverse stereotyped cell arrangements in the fly visual system. Proc Natl Acad Sci U S A 112:E2967.
2	Feng K, Palfreyman MT, Häsemeyer M, Talsma A, Dickson BJ (2014) Ascending SAG Neurons Control Sexual Receptivity of Drosophila Females. Neuron 83:135-148.
3	Wang F, Wang K, Forknall N, Patrick C, Yang T, Parekh R, Bock D, Dickson BJ (2020) Neural circuitry linking mating and egg laying in Drosophila females. Nat 2020 5797797 579:101-105.
4	Andlauer TFM, Scholz-Kornehl S, Tian R, Kirchner M, Babikir HA, Depner H, Loll B, Quentin C, Gupta VK, Holt MG, Dipt S, Cressy M, Wahl MC, Fiala A, Selbach M, Schwärzel M, Sigrist SJ (2014) Drep-2 is a novel synaptic protein important for learning and memory. Elife 3:1-24.
5	This study; the pC2l split-LexA line labels 7.7 +/- 0.8 (n=8) pC2l neurons/hemisphere.
6	Pfeiffer BD, Ngo T-TB, Hibbard KL, Murphy C, Jenett A, Truman JW, Rubin GM (2010) Refinement of tools for targeted gene expression in Drosophila. Genetics 186:735-755.
7	Tuthill JC, Nern A, Holtz SL, Rubin GM, Reiser MB (2013) Contributions of the 12 neuron classes in the fly lamina to motion vision. Neuron 79:128.
8	Chen Y, Akin O, Nern A, Tsui CK, Pecot MY, Zipursky SL (2014) Cell-type Specific Labeling of Synapses in vivo through Synaptic Tagging with Recombination (STaR). Neuron 81:280.
9	Gift from Yoshi Aso
10	MB-DPM identified in this line by Yichun Shuai and Glenn Turner
11	Tanaka NK, Tanimoto H, Ito K (2008) Neuronal assemblies of the Drosophila mushroom body. J Comp Neurol 508:711-755.
12	Aso Y, Ray RP, Long X, Bushey D, Cichewicz K, Ngo TT, Sharp B, Christoforou C, Hu A, Lemire A, Tillberg P, Hirsh J, Litwin-Kumar A, Rubin GM (2019) Nitric oxide acts as a cotransmitter in a subset of dopaminergic neurons to diversify memory dynamics. Elife 8.
13	Ding Y, Lillvis JL, Cande J, Berman GJ, Arthur BJ, Long X, Xu M, Dickson BJ, Stern DL (2019) Neural Evolution of Context-Dependent Fly Song. Curr Biol 29:1089-1099.e7.
